# Supplementary material for: A UK nationwide prospective study of treatment change in MODY: genetic subtype and clinical characteristics predict optimal glycaemic control after discontinuing insulin and metformin
Source: PubMed Central journal article supplement (PMC6223847; doi:10.1007/s00125-018-4728-6), 2018-09-18
Supplement: 125_2018_4728_MOESM1_ESM.pdf [file 125_2018_4728_MOESM1_ESM.pdf]

**ESM Table 1.** Heterozygous MODY causing variants in the *GCK*, *HNF1A* and *HNF4A* genes identified in the study cohort who underwent treatment change (n=44). Variants are described according to HGVS nomenclature guidelines (<http://varnomen.hgvs.org/>) using reference sequences NM\_000162.4 for *GCK*, NM\_000545.6 for *HNF1A* and NM\_175914.4 for *HNF4A*. 0 in Glycaemic control column means HbA<sub>1c</sub> ≤58mmol/mol (≤7.5%) with Diet/SU alone at 2 years and 1 means HbA<sub>1c</sub> >58 or ≤58mmol/mol (>7.5 or ≤7.5%) on additional treatment at 2 years.

| studyId | Relationship  | Gene         | Protein Change | Nucleotide Change | Protein Effect    | Variant Classification | Glycaemic control |
|---------|---------------|--------------|----------------|-------------------|-------------------|------------------------|-------------------|
| 94      |               | <i>GCK</i>   | p.(Ser340Ile)  | c.1019G>T         | Missense          | Pathogenic             |                   |
| 360     |               | <i>GCK</i>   | p.(Val253fs)   | c.757del          | Frameshift        | Pathogenic             |                   |
| 624     | Proband       | <i>GCK</i>   | p.(Val374fs)   | c.1119_1120dup    | Frameshift        | Pathogenic             |                   |
| 625     | Sister of 624 | <i>GCK</i>   | p.(Val374fs)   | c.1119_1120dup    | Frameshift        | Pathogenic             |                   |
| 1025    |               | <i>GCK</i>   | p.(Tyr215Ter)  | c.645C>A          | Stop gain         | Pathogenic             |                   |
| 1194    |               | <i>GCK</i>   | p.(Arg191Trp)  | c.571C>T          | Missense          | Pathogenic             |                   |
| 1375    |               | <i>GCK</i>   | p.(Lys39del)   | c.115_117del      | In-frame deletion | Likely Pathogenic      |                   |
| 1406    |               | <i>GCK</i>   | p.(Phe150Ser)  | c.449T>C          | Missense          | Pathogenic             |                   |
| 110     |               | <i>HNF1A</i> | p.(Glu275del)  | c.824_826del      | In-frame deletion | Pathogenic             | 0                 |
| 227     | Sister of 351 | <i>HNF1A</i> | p.(Gly207Asp)  | c.620G>A          | Missense          | Pathogenic             | 1                 |
| 228     | Son of 351    | <i>HNF1A</i> | p.(Gly207Asp)  | c.620G>A          | Missense          | Pathogenic             | 0                 |
| 351     | Proband       | <i>HNF1A</i> | p.(Gly207Asp)  | c.620G>A          | Missense          | Pathogenic             | 1                 |
| 361     |               | <i>HNF1A</i> | p.(Gly292fs)   | c.872dup          | Frameshift        | Pathogenic             | 1                 |
| 394     | Mother of 395 | <i>HNF1A</i> | p.(Pro291fs)   | c.872del          | Frameshift        | Pathogenic             | 1                 |
| 395     | Proband       | <i>HNF1A</i> | p.(Pro291fs)   | c.872del          | Frameshift        | Pathogenic             | 1                 |
| 455     |               | <i>HNF1A</i> | p.(Gly292fs)   | c.872dup          | Frameshift        | Pathogenic             | 0                 |
| 529     |               | <i>HNF1A</i> | p.(Thr260Met)  | c.779C>T          | Missense          | Pathogenic             | 0                 |
| 599     |               | <i>HNF1A</i> | p.(Arg203His)  | c.608G>A          | Missense          | Pathogenic             | 0                 |
| 618     |               | <i>HNF1A</i> | p.(Asn62fs)    | c.185del          | Frameshift        | Pathogenic             | 1                 |
| 620     |               | <i>HNF1A</i> | p.(Pro291fs)   | c.872del          | Frameshift        | Pathogenic             | 0                 |
| 659     |               | <i>HNF1A</i> | p.(Pro291fs)   | c.872del          | Frameshift        | Pathogenic             | 0                 |
| 682     |               | <i>HNF1A</i> | p.?            | c.1502-6G>A       | Aberrant splicing | Pathogenic             | 1                 |
| 756     |               | <i>HNF1A</i> | p.?            | c.714-2A>G        | Aberrant splicing | Pathogenic             | 1                 |
| 771     | Sister of 772 | <i>HNF1A</i> | p.(Gly292fs)   | c.872dup          | Frameshift        | Pathogenic             | 1                 |
| 772     | Sister of 771 | <i>HNF1A</i> | p.(Gly292fs)   | c.872dup          | Frameshift        | Pathogenic             | 1                 |
| 793     |               | <i>HNF1A</i> | p.(Arg203His)  | c.608G>A          | Missense          | Pathogenic             | 1                 |
| 867     |               | <i>HNF1A</i> | p.(Ser608fs)   | c.1822_1823del    | Frameshift        | Pathogenic             | 1                 |
| 897     | Mother of 900 | <i>HNF1A</i> | p.(Pro447Leu)  | c.1340C>T         | Missense          | Pathogenic             | 1                 |
| 900     | Proband       | <i>HNF1A</i> | p.(Pro447Leu)  | c.1340C>T         | Missense          | Pathogenic             | 1                 |
| 1022    |               | <i>HNF1A</i> | p.(Gly292fs)   | c.872dup          | Frameshift        | Pathogenic             | 1                 |
| 1067    |               | <i>HNF1A</i> | p.(Ala276Asp)  | c.827C>A          | Missense          | Likely Pathogenic      | 0                 |
| 1178    |               | <i>HNF1A</i> | p.(Arg271Gln)  | c.812G>A          | Missense          | Pathogenic             | 1                 |
| 1331    |               | <i>HNF1A</i> | p.?            | c.956-2A>C        | Aberrant splicing | Pathogenic             | 0                 |
| 1357    |               | <i>HNF1A</i> | p.(Pro379Thr)  | c.1135C>A         | Missense          | Likely                 | 1                 |

|         |  |              |               |            |                   |                   |   |
|---------|--|--------------|---------------|------------|-------------------|-------------------|---|
|         |  |              |               |            |                   | Pathogenic        |   |
| 8000089 |  | <i>HNF1A</i> | p.(Asn450fs)  | c.1349dup  | Frameshift        | Pathogenic        | 1 |
| 8000170 |  | <i>HNF1A</i> | p.(Arg131Trp) | c.391C>T   | Missense          | Pathogenic        | 0 |
| 8002003 |  | <i>HNF1A</i> | p.(Thr10Pro)  | c.28A>C    | Missense          | Likely Pathogenic | 0 |
| 894     |  | <i>HNF4A</i> | p.(Ala107Asp) | c.320C>A   | Missense          | Pathogenic        | 1 |
| 917     |  | <i>HNF4A</i> | p.(Leu247Pro) | c.740T>C   | Missense          | Pathogenic        | 1 |
| 1085    |  | <i>HNF4A</i> | p.(Arg112Gln) | c.335G>A   | Missense          | Pathogenic        | 0 |
| 1117    |  | <i>HNF4A</i> | p.(Arg114Trp) | c.340C>T   | Missense          | Pathogenic        | 1 |
| 1339    |  | <i>HNF4A</i> | p.(Arg290His) | c.869G>A   | Missense          | Pathogenic        | 1 |
| 1348    |  | <i>HNF4A</i> | p.(Arg114Trp) | c.340C>T   | Missense          | Pathogenic        | 1 |
| 1380    |  | <i>HNF4A</i> | p.?           | c.319+5G>A | Aberrant splicing | Likely Pathogenic | 0 |

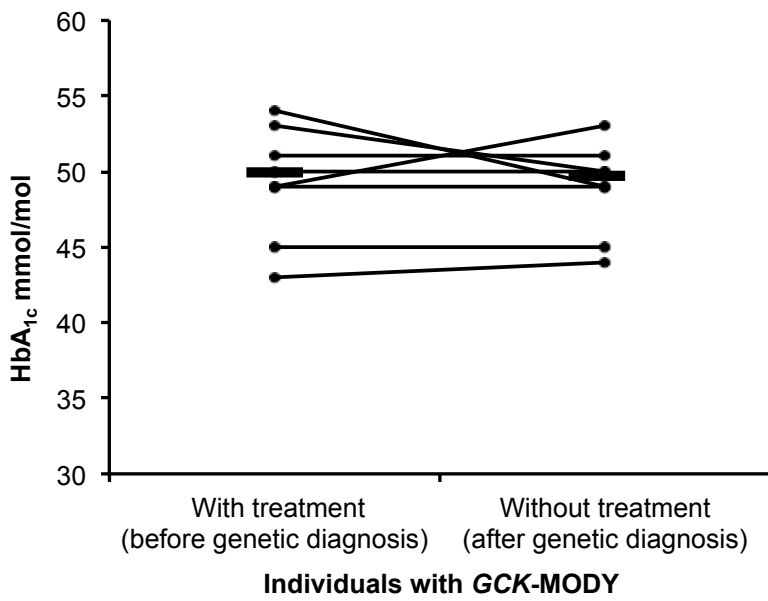

**ESM Fig 1:** HbA<sub>1c</sub> of individuals with GCK-MODY before and after the post genetic diagnosis. The graph shows the HbA<sub>1c</sub> for the individuals with GCK-MODY ( $n=8$ ) before the genetic diagnosis on treatment and after stopping the treatment for median 1.25 years (IQR 1-2 , range 0.25 to 3 years) following the genetic diagnosis. Median HbA<sub>1c</sub> is highlighted with black rectangle.

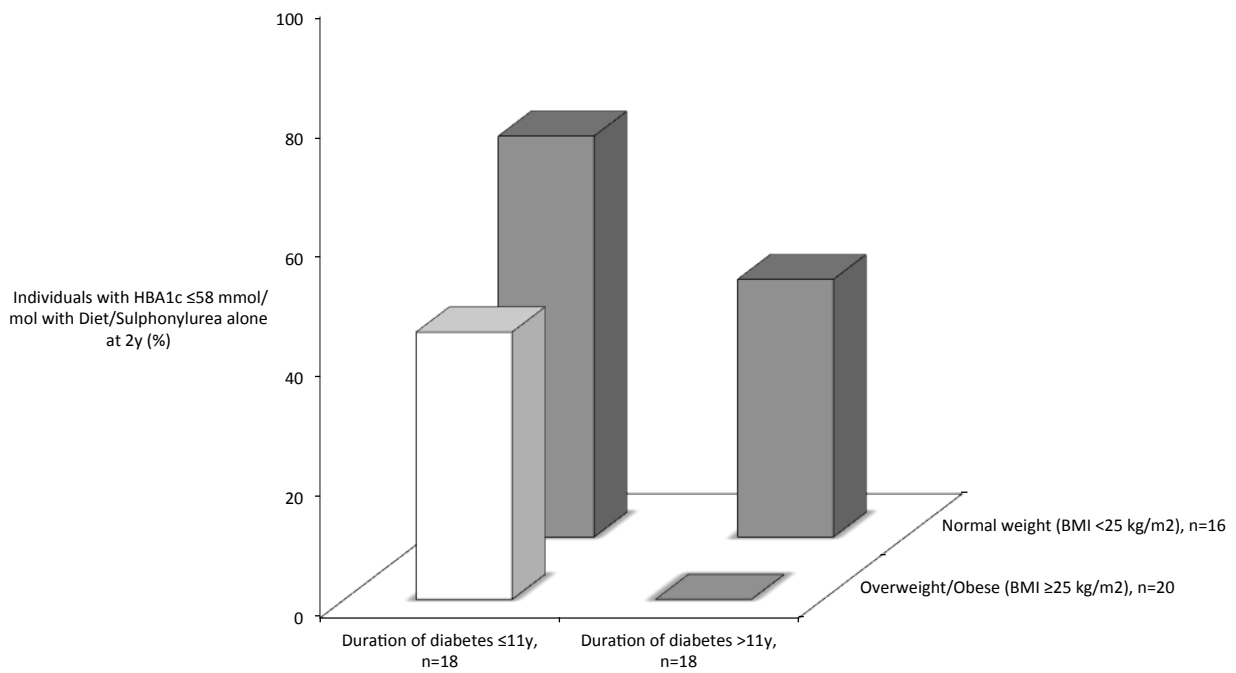

**ESM Fig 2.** The effect of duration of diabetes and BMI at genetic diagnosis on ability to achieve good glycaemic control with diet/sulphonyurias alone at 2 years post genetic diagnosis in individuals with *HNF1A/HNF4A*-MODY. Duration of diabetes were divided into two groups by the median value of the *HNF1A/HNF4A*-MODY cohort ( $n=36$ ).
